# Supplementary material
Source: PubMed Central journal article supplement (PMC1954670)

Supplementary Figure1, Hueber et al.

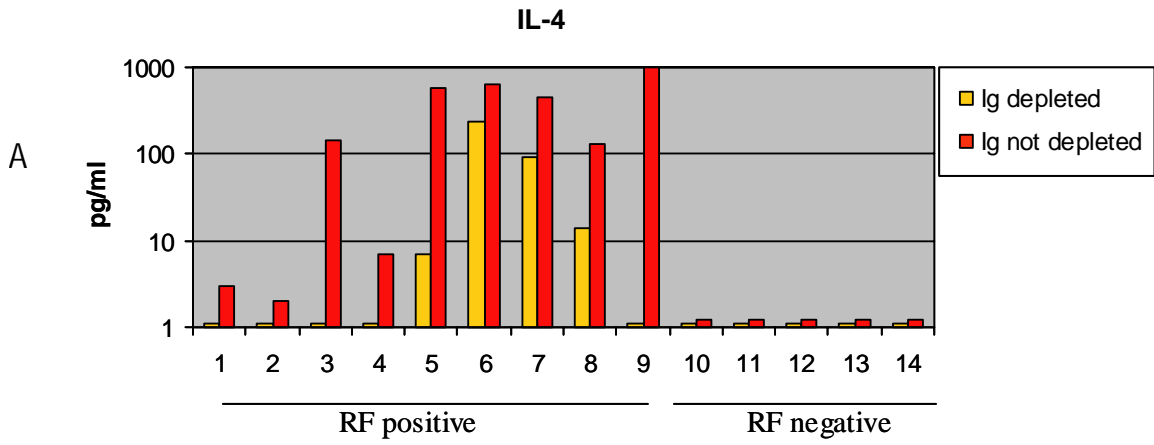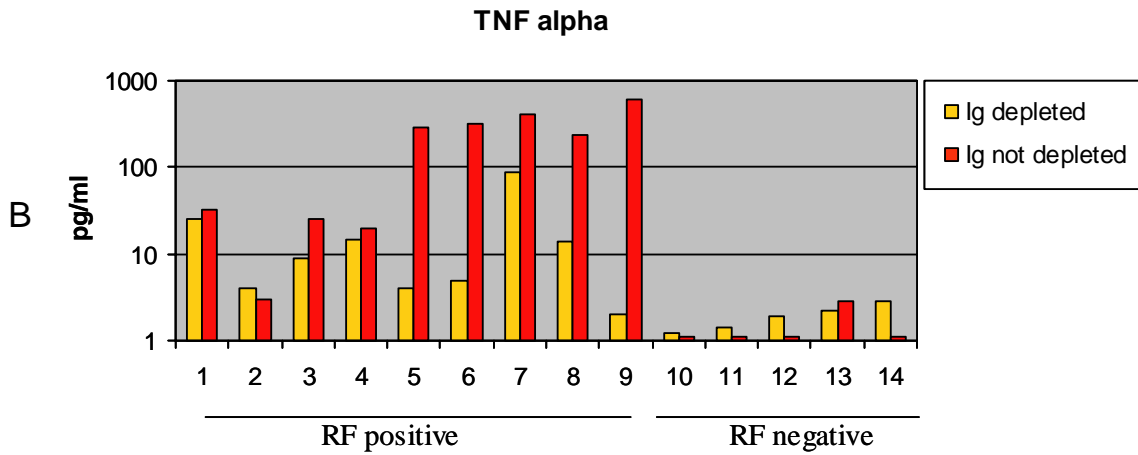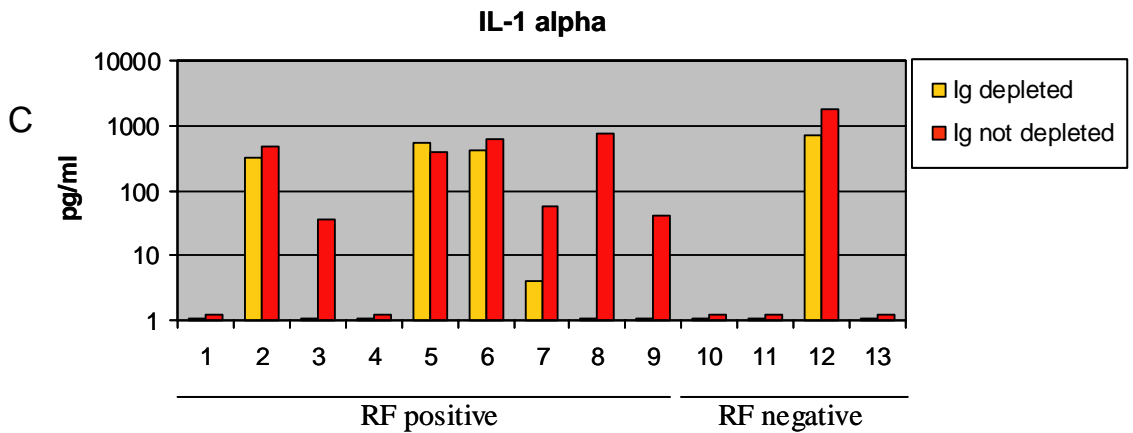

Supplement: annrheumd_ard.2006.054924_1.pdf [file annrheumd_ard.2006.054924_1.pdf]

Supplementary Figure 2, Hueber et al.

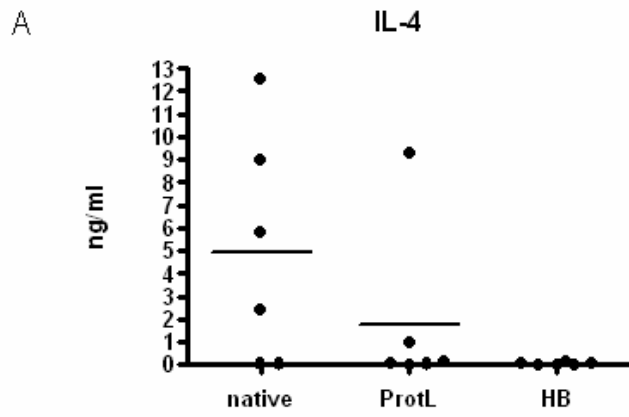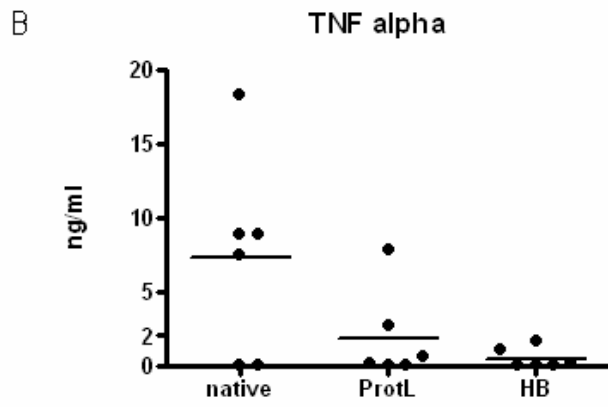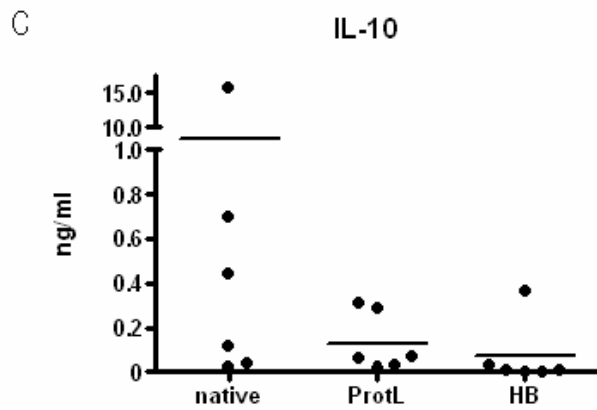

Supplement: annrheumd_ard.2006.054924_2.pdf [file annrheumd_ard.2006.054924_2.pdf]
